# Supplementary material for: Unknown Organofluorine Mixtures in U.S. Adult Serum:Contribution from Pharmaceuticals?
Source: MDPI journal article supplement (doi:10.3390/toxics11050416), 2023-04-27
Supplement: s1 [file s1]

## SUPPLEMENTAL INFORMATION:

**Table S1.** Analytes for Targeted LC-MS/MS and their limits of quantification (LOQ).

| Name                                | Acronym             | Classification | Limit of Quantification<br>(ng/mL) |
|-------------------------------------|---------------------|----------------|------------------------------------|
| Perfluorobutanoate                  | PFBA                | Short-chain    | 0.05                               |
| Perfluoropentanoate                 | PFPeA               | Short-chain    | 0.02                               |
| Perfluorohexanoate                  | PFHxA               | Short-chain    | 0.05                               |
| Perfluoroheptanoate                 | PFHpA               | Short-chain    | 0.04                               |
| Perfluorooctanoate                  | PFOA                | Long-chain     | 0.02                               |
| Perfluorononanoate                  | PFNA                | Long-chain     | 0.02                               |
| Perfluorodecanoate                  | PFDA                | Long-chain     | 0.065                              |
| Perfluoroundecanoate                | PFA <sub>n</sub> DA | Long-chain     | 0.02                               |
| Perfluorododecanoate                | PFD <sub>o</sub> DA | Long-chain     | 0.02                               |
| Perfluorotridecanoate               | PFT <sub>r</sub> DA | Long-chain     | 0.02                               |
| Perfluorotetradecanoate             | PFTDA               | Long-chain     | 0.02                               |
| Perfluorohexadecanoic acid          | PFH <sub>x</sub> DA | Long-chain     | 0.05                               |
| Perfluorooctadecanoic acid          | PFO <sub>c</sub> DA | Long-chain     | 0.05                               |
| Perfluorobutane sulfonate           | PFBS                | Short-chain    | 0.02                               |
| Perfluoropentane sulfonate          | PFPeS               | Short-chain    | 0.02                               |
| Perfluorohexane sulfonate           | PFH <sub>x</sub> S  | Long-chain     | 0.03                               |
| Perfluoroheptane sulfonate          | PFHpS               | Long-chain     | 0.02                               |
| Perfluorooctane sulfonate           | PFOS                | Long-chain     | 0.04                               |
| m2-perfluorooctane sulfonate        | Dimethyl-PFOS       | Long-chain     | 0.02                               |
| 3,4,5-m-perfluorooctane sulfonate   | 3/4/5-m-PFOS        | Long-chain     | 0.04                               |
| 6, 2-m-perfluorooctane sulfonate    | 6/2-m-PFOS          | Long-chain     | 0.05                               |
| Perfluoro-1-methylheptane sulfonate | 1-m-PFOS            | Long-chain     | 0.02                               |
| Perfluorononane sulfonate           | PFNS                | Long-chain     | 0.02                               |
| Perfluorodecane sulfonate           | PFDS                | Long-chain     | 0.02                               |
| Perfluorododecane sulfonate         | PFD <sub>o</sub> DS | Long-chain     | 0.02                               |

|                                                      |                |                     |      |
|------------------------------------------------------|----------------|---------------------|------|
| Perfluorobutane sulfonamide                          | FBSA           | PFSA precursor      | 0.04 |
| Perfluorohexane sulfonamide                          | PFHxSA         | PFSA precursor      | 0.04 |
| N-Methyl perfluorohexane sulfonamide                 | Me-PFHxSA      | PFSA precursor      | 0.02 |
| Perfluorooctane sulfonamide                          | FOSA           | PFSA precursor      | 0.05 |
| 3:3 fluorotelomer carboxylic acid                    | 3:3 FTCA       | PFCA precursor      | 0.05 |
| 5:3 fluorotelomer carboxylic acid                    | 5:3 FTCA       | PFCA precursor      | 0.02 |
| 7:3 fluorotelomer carboxylic acid                    | 7:3 FTCA       | PFCA precursor      | 0.05 |
| 6:2 fluorotelomer carboxylic acid                    | 6:2 FTUCA      | PFCA precursor      | 0.03 |
| 8:2 fluorotelomer carboxylic acid                    | 8:2 FTUCA      | PFCA precursor      | 0.03 |
| 10:2 fluorotelomer carboxylic acid                   | 10:2 FTUCA     | PFCA precursor      | 0.03 |
| 4:2 fluorotelomer sulfonate                          | 4:2 FTSA       | PFCA precursor      | 0.02 |
| 6:2 fluorotelomer sulfonate                          | 6:2 FTSA       | PFCA precursor      | 0.02 |
| 8:2 fluorotelomer sulfonate                          | 8:2 FTSA       | PFCA precursor      | 0.02 |
| 10:2 fluorotelomer sulfonate                         | 10:2 FTSA      | PFCA precursor      | 0.02 |
| Perfluorohexylphosphonic acid                        | PFHxPA         | Potential precursor | 0.05 |
| C6/C6 perfluorophosphinic acid                       | C6/C6 PFPiA    | Potential precursor | 0.05 |
| C6/C8 perfluorophosphinic acid                       | C6/C8 PFPiA    | Potential precursor | 0.05 |
| C8/C8 perfluorophosphinic acid                       | C8/C8 PFPiA    | Potential precursor | 0.05 |
| 2,3,3,3-tetrafluoro-2-(heptafluoropropoxy)propanoate | HFPO-DA (GenX) | Novel species       | 0.02 |
| 4,8-dioxa-3H-perfluorononanoic acid                  | ADONA          | Novel species       | 0.02 |
| Perfluoroethylcyclohexane Sulfonate                  | PFECHS         | Novel species       | 0.02 |
| 6:2 chlorinated polyfluoroalkyl ether sulfonic acid  | 6:2 Cl-PFESA   | Novel species       | 0.02 |
| 8:2 chlorinated polyfluoroalkyl ether sulfonic acid  | 8:2 Cl-PFESA   | Novel species       | 0.02 |

Table S2. Concentrations of target PFAS per subject (ng/mL), extractable organofluorine (EOF; ng/mL), and the concentration of fluorine attributable to total PFAS (F<sub>44</sub>PFAS; ng F/mL)<sup>1</sup>

|                             |        |                                   |                                  |                  |                      |                   |       |      |      |       |        |      |        |       |       |         |        |      |      |       |      |      |       |      |  | 6:2 |  | 6:2 Cl- |  |
|-----------------------------|--------|-----------------------------------|----------------------------------|------------------|----------------------|-------------------|-------|------|------|-------|--------|------|--------|-------|-------|---------|--------|------|------|-------|------|------|-------|------|--|-----|--|---------|--|
| Sex                         | Age    | Σ <sub>44</sub> PFAS <sup>2</sup> | Σ <sub>5</sub> PFAS <sup>3</sup> | EOF <sup>4</sup> | F <sub>44</sub> PFAS | PFOS <sup>5</sup> | PFHxS | PFNA | PFOA | PFHpS | PFECHS | PFBS | PFUnDA | PFHpA | PFPeS | PFTTrDA | PFDODA | FOSA | FTSA | PFPeA | PFDA | FBSA | PFESA |      |  |     |  |         |  |
| Reported Pharmaceutical Use | Male   | 50                                | 4.99                             | 4.71             | 7.36                 | 2.79              | 2.87  | 0.80 | 0.31 | 0.66  | 0.07   | 0.26 | 0.02   | <LOD  | <LOD  | <LOD    | <LOD   | <LOD | <LOD | <LOD  | <LOD | <LOD | <LOD  |      |  |     |  |         |  |
|                             | Male   | 32                                | 9.76                             | 9.50             | 6.34                 | 2.14              | 5.48  | 1.67 | 0.39 | 1.73  | 0.24   | 0.24 | 0.01   | <LOD  | <LOD  | <LOD    | <LOD   | <LOD | <LOD | <LOD  | <LOD | <LOD | <LOD  |      |  |     |  |         |  |
|                             | Male   | 47                                | 9.86                             | 8.68             | 6.08                 | 2.77              | 5.01  | 1.78 | 0.54 | 1.26  | 0.09   | 0.72 | 0.08   | 0.07  | 0.24  | 0.02    | <LOD   | <LOD | <LOD | 0.02  | <LOD | <LOD | 0.04  | <LOD |  |     |  |         |  |
|                             | Male   | 65                                | 26.24                            | 24.64            | 11.22                | 9.52              | 14.44 | 7.07 | 0.90 | 1.81  | 0.42   | 1.54 | 0.03   | 0.02  | <LOD  | 0.01    | <LOD   | <LOD | <LOD | <LOD  | <LOD | <LOD | <LOD  |      |  |     |  |         |  |
|                             | Male   | 36                                | 17.21                            | 15.93            | 10.92                | 6.28              | 7.00  | 4.90 | 0.91 | 2.83  | 0.29   | 0.99 | 0.04   | 0.03  | 0.20  | 0.02    | <LOD   | <LOD | <LOD | <LOD  | <LOD | <LOD | <LOD  |      |  |     |  |         |  |
|                             | Female | 74                                | 5.22                             | 4.67             | 8.72                 | 2.67              | 2.47  | 0.92 | 0.35 | 0.86  | 0.06   | 0.19 | 0.02   | 0.05  | <LOD  | <LOD    | <LOD   | <LOD | 0.01 | <LOD  | 0.28 | <LOD | <LOD  | <LOD |  |     |  |         |  |
|                             | Female | 49                                | 4.66                             | 4.20             | 6.18                 | 2.04              | 2.23  | 0.96 | 0.25 | 0.72  | 0.04   | 0.42 | 0.04   | <LOD  | <LOD  | <LOD    | <LOD   | <LOD | <LOD | <LOD  | <LOD | <LOD | <LOD  |      |  |     |  |         |  |
|                             | Female | 48                                | 11.01                            | 9.93             | 6.18                 | 2.28              | 6.68  | 1.05 | 0.81 | 1.29  | 0.11   | 0.21 | 0.02   | 0.11  | <LOD  | <LOD    | <LOD   | <LOD | <LOD | <LOD  | <LOD | 0.74 | <LOD  | <LOD |  |     |  |         |  |
|                             | Female | 38                                | 2.88                             | 2.72             | 3.66                 | 1.05              | 1.52  | 0.43 | 0.24 | 0.47  | 0.06   | 0.08 | 0.03   | 0.05  | <LOD  | <LOD    | <LOD   | <LOD | <LOD | <LOD  | <LOD | <LOD | <LOD  | <LOD |  |     |  |         |  |
|                             | Female | 62                                | 3.25                             | 3.09             | 2.67                 | 0.53              | 1.61  | 0.70 | 0.27 | 0.47  | 0.05   | 0.12 | 0.04   | <LOD  | <LOD  | <LOD    | <LOD   | <LOD | <LOD | <LOD  | <LOD | <LOD | <LOD  | <LOD |  |     |  |         |  |
| No Pharmaceutical Use       | Male   | 37                                | 6.64                             | 6.40             | 4.52                 | 1.59              | 3.14  | 2.22 | 0.30 | 0.68  | 0.06   | 0.17 | <LOD   | 0.06  | <LOD  | <LOD    | 0.01   | <LOD | <LOD | <LOD  | <LOD | <LOD | <LOD  |      |  |     |  |         |  |
|                             | Male   | 30                                | 5.68                             | 5.47             | 6.07                 | 3.27              | 2.53  | 1.61 | 0.37 | 0.87  | 0.09   | 0.14 | 0.03   | 0.04  | <LOD  | <LOD    | <LOD   | <LOD | <LOD | <LOD  | <LOD | <LOD | <LOD  |      |  |     |  |         |  |
|                             | Male   | 59                                | 14.90                            | 13.88            | 10.04                | 6.99              | 8.46  | 2.81 | 0.59 | 1.77  | 0.24   | 0.63 | 0.05   | 0.12  | 0.15  | 0.02    | 0.03   | 0.02 | <LOD | <LOD  | <LOD | <LOD | <LOD  |      |  |     |  |         |  |
|                             | Male   | 46                                | 8.72                             | 7.83             | 5.30                 | 3.95              | 3.98  | 1.90 | 0.45 | 1.38  | 0.12   | 0.37 | 0.07   | 0.05  | 0.37  | <LOD    | <LOD   | <LOD | <LOD | 0.01  | <LOD | <LOD | <LOD  | 0.02 |  |     |  |         |  |
|                             | Male   | 52                                | 6.06                             | 5.87             | 6.84                 | 1.86              | 3.28  | 0.97 | 0.60 | 0.93  | 0.09   | 0.15 | 0.04   | <LOD  | <LOD  | <LOD    | <LOD   | <LOD | <LOD | <LOD  | <LOD | <LOD | <LOD  |      |  |     |  |         |  |
|                             | Female | 28                                | 3.95                             | 3.87             | 2.02                 | 0.38              | 0.57  | 3.14 | 0.15 | <LOD  | <LOD   | 0.01 | <LOD   | 0.05  | <LOD  | <LOD    | <LOD   | 0.02 | <LOD | <LOD  | <LOD | <LOD | <LOD  | <LOD |  |     |  |         |  |
|                             | Female | 57                                | 8.61                             | 8.49             | 7.74                 | 4.66              | 5.23  | 1.45 | 0.42 | 1.26  | 0.13   | 0.07 | 0.02   | 0.03  | <LOD  | <LOD    | <LOD   | <LOD | <LOD | <LOD  | <LOD | <LOD | <LOD  |      |  |     |  |         |  |
|                             | Female | 55                                | 3.16                             | 3.05             | 7.09                 | 1.63              | 1.64  | 0.55 | 0.25 | 0.56  | 0.05   | 0.03 | 0.01   | 0.05  | <LOD  | <LOD    | 0.01   | <LOD | <LOD | <LOD  | <LOD | <LOD | <LOD  |      |  |     |  |         |  |
|                             | Female | 33                                | 3.16                             | 3.16             | 2.31                 | 1.37              | 1.80  | 0.47 | 0.27 | 0.57  | 0.05   | <LOD | <LOD   | <LOD  | <LOD  | <LOD    | <LOD   | <LOD | <LOD | <LOD  | <LOD | <LOD | <LOD  |      |  |     |  |         |  |
|                             | Female | 52                                | 4.55                             | 4.46             | 8.67                 | 1.19              | 2.58  | 0.71 | 0.34 | 0.77  | 0.07   | 0.05 | 0.01   | <LOD  | <LOD  | <LOD    | <LOD   | <LOD | 0.03 | <LOD  | <LOD | <LOD | <LOD  | <LOD |  |     |  |         |  |

<sup>1</sup> Compounds not detected in any samples are not shown.

<sup>2</sup> Values reported below the LOD were replaced with zero to determine Σ<sub>44</sub>PFAS.

<sup>3</sup> Sum of compounds detected in >95% of samples and included in NHANES 2017-2018 (PFOS, PFHxS, PFNA, PFOA, PFHpS)

<sup>4</sup> **bold** values indicate lab reported values <LOQ.

<sup>5</sup> PFOS is represented as the sum of branched and linear isomers.

**Tables S3a-S3c:** Unexplained organofluorine (UOF) stratified by sex, race, and age.

**Table S3a:** Comparing concentration of UOF between male and female donors.

|        | Unexplained Fluorine (ng F/mL) |      |        |      |         |         |
|--------|--------------------------------|------|--------|------|---------|---------|
|        | N                              | Mean | Median | SD   | Minimum | Maximum |
| Female | 10                             | 3.74 | 3.49   | 2.08 | 0.94    | 7.48    |
| Male   | 10                             | 3.35 | 3.18   | 1.24 | 1.35    | 4.98    |

**Table S3b:** Comparing concentration of UOF between Black and Hispanic donors.

|          | Unexplained Fluorine (ng F/mL) |      |        |      |         |         |
|----------|--------------------------------|------|--------|------|---------|---------|
|          | N                              | Mean | Median | SD   | Minimum | Maximum |
| Black    | 8                              | 3.32 | 3.12   | 1.17 | 1.35    | 4.98    |
| Hispanic | 12                             | 3.70 | 3.61   | 1.98 | 0.94    | 7.48    |

**Table S3c:** Comparing concentration of UOF between donors above and below the median age (48.5).

|                  | Unexplained Fluorine (ng F/mL) |      |        |      |         |         |
|------------------|--------------------------------|------|--------|------|---------|---------|
|                  | N                              | Mean | Median | SD   | Minimum | Maximum |
| Below Median Age | 10                             | 2.83 | 2.87   | 1.24 | 0.94    | 4.64    |
| Above Median Age | 10                             | 4.27 | 4.35   | 1.81 | 1.70    | 7.48    |
