# Supplementary material for: Unknown Organofluorine Mixtures in U.S. Adult Serum:Contribution from Pharmaceuticals?
Source: Toxics. 2023 Apr 27;11(5):416. doi: 10.3390/toxics11050416 (PMC10221009; doi:10.3390/toxics11050416)
Supplement: Supplementary file 1 [file toxics-11-00416-s001.zip]

Archive with 4 entries (4 files):
- toxics-2316311-supplementary.zip
- toxics-2316311-tex.zip
- toxics-2316311.pdf
- toxics-2316311.zip
