# Supplementary figures and images for: Unknown Organofluorine Mixtures in U.S. Adult Serum:Contribution from Pharmaceuticals?
Source: MDPI journal article supplement (doi:10.3390/toxics11050416), 2023-04-27

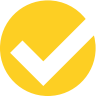

check for  
updates

Supplement: s1 [file s1]

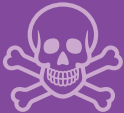

*toxics*

Supplement: s1 [file s1]

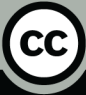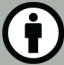

BY

Supplement: s1 [file s1]

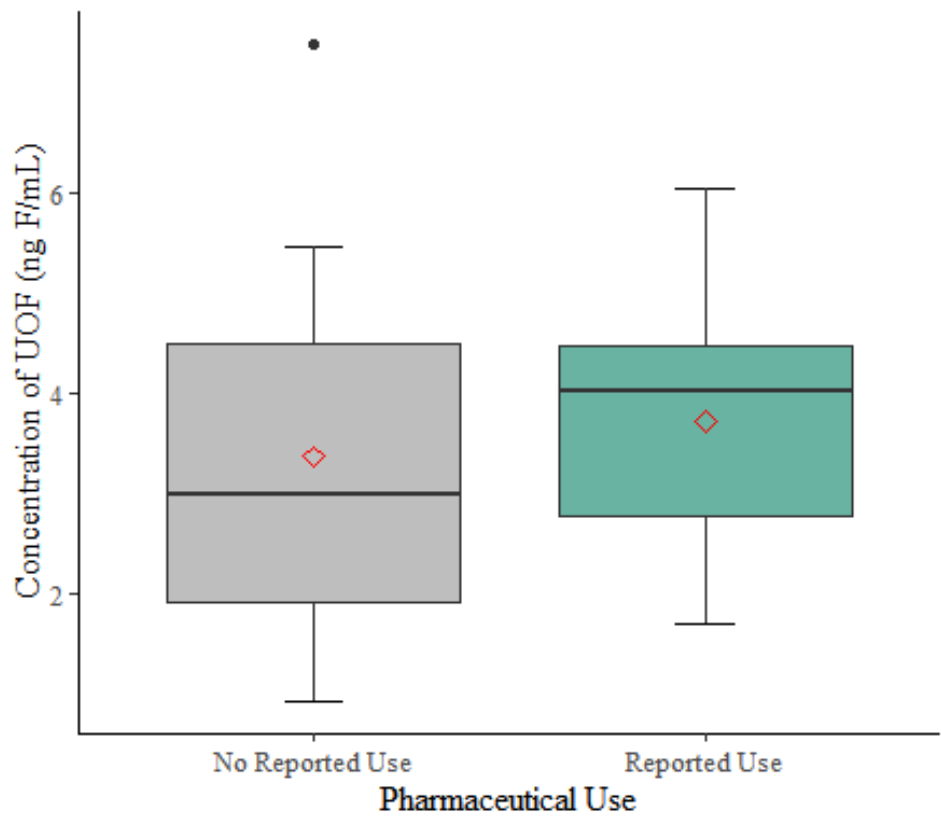

Supplement: s1 [file s1]

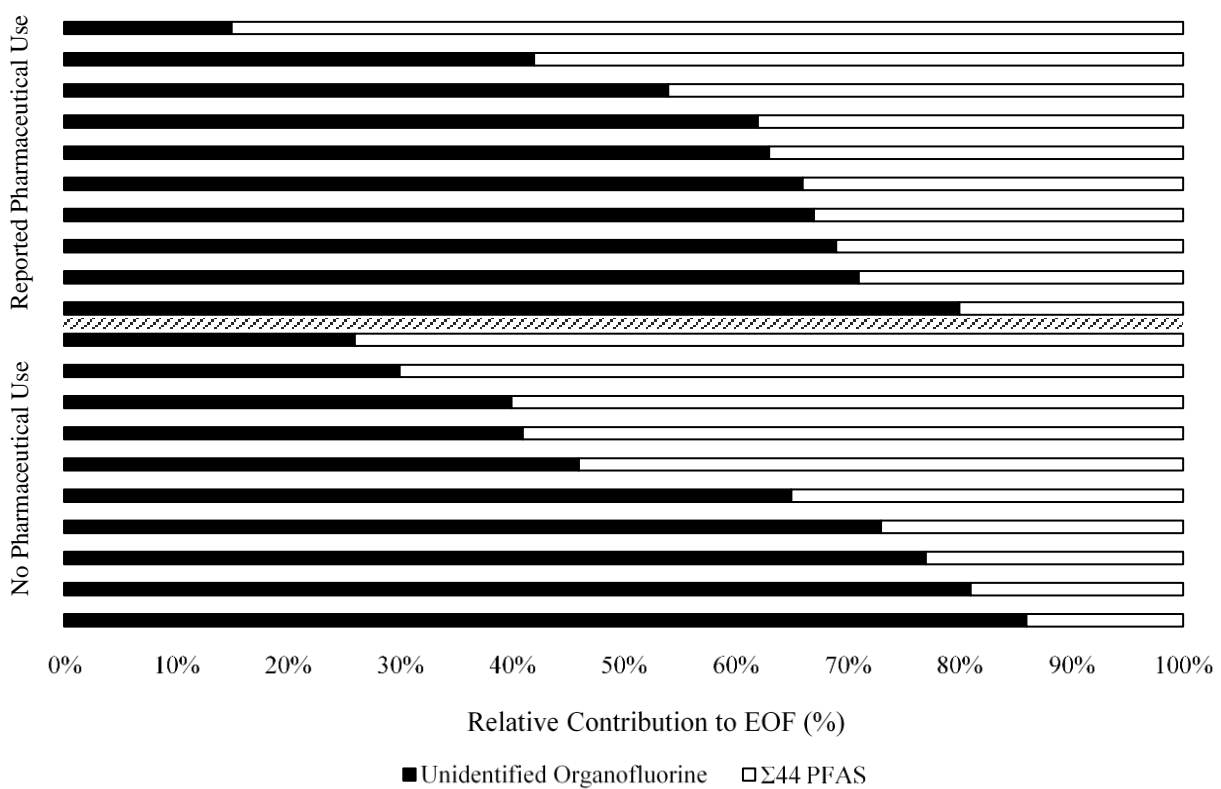

Supplement: s1 [file s1]
